# Supplementary material for: Measurement report: Ice nucleation ability of perthite feldspar powder
Source: Copernicus journal article supplement (doi:10.5194/egusphere-2025-5014), 2025-10-23
Supplement: Supplementary file [file egusphere-2025-5014-AC2-supplement.pdf]

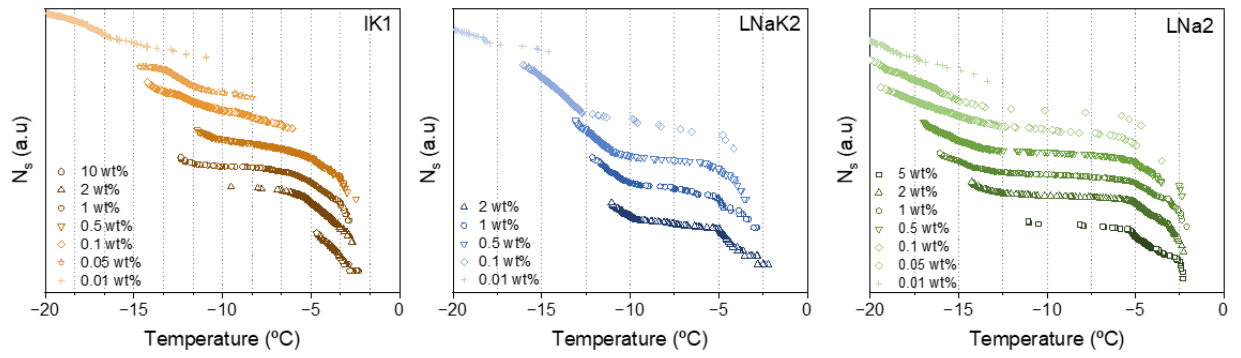

Figure C3. Ice-nucleating active site density,  $N_s(T)$ , as a function of temperature for the feldspar suspensions; IK1 (left), LNaK2 (middle), and LNa2 (right). Each curve represents a different particle mass concentration.
